# Supplementary material for: Potential value of expression of receptor accessory protein 4 for evaluating the prognosis of lower-grade glioma patients
Source: publisher site journal article supplement (doi:10.18632/aging.205695), 2024-03-28
Supplement: Supplementary file [file aging-v16i7-205695-supplementary-material-SD1.pdf]

**SUPPLEMENTARY FIGURES**

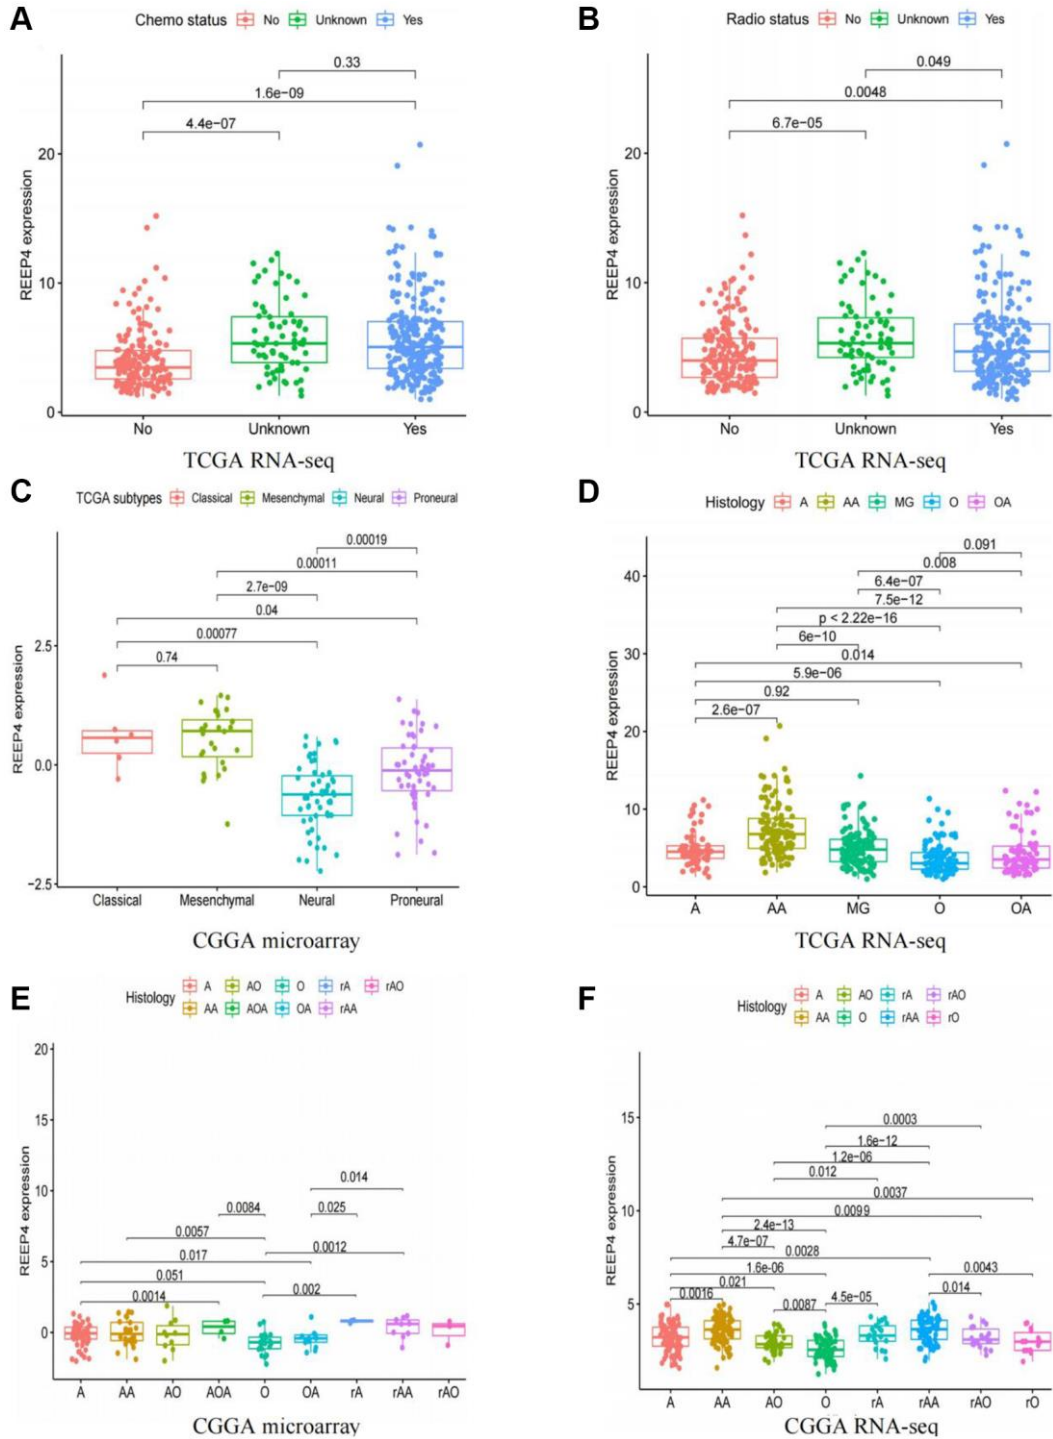

**Supplementary Figure 1. Relationship between receptor accessory protein 4 (REEP4) expression and clinical features and histology type. (A) Chemotherapy status. (B) Radiotherapy status. (C) TCGA subtype. (D–F) Histological subtype.**

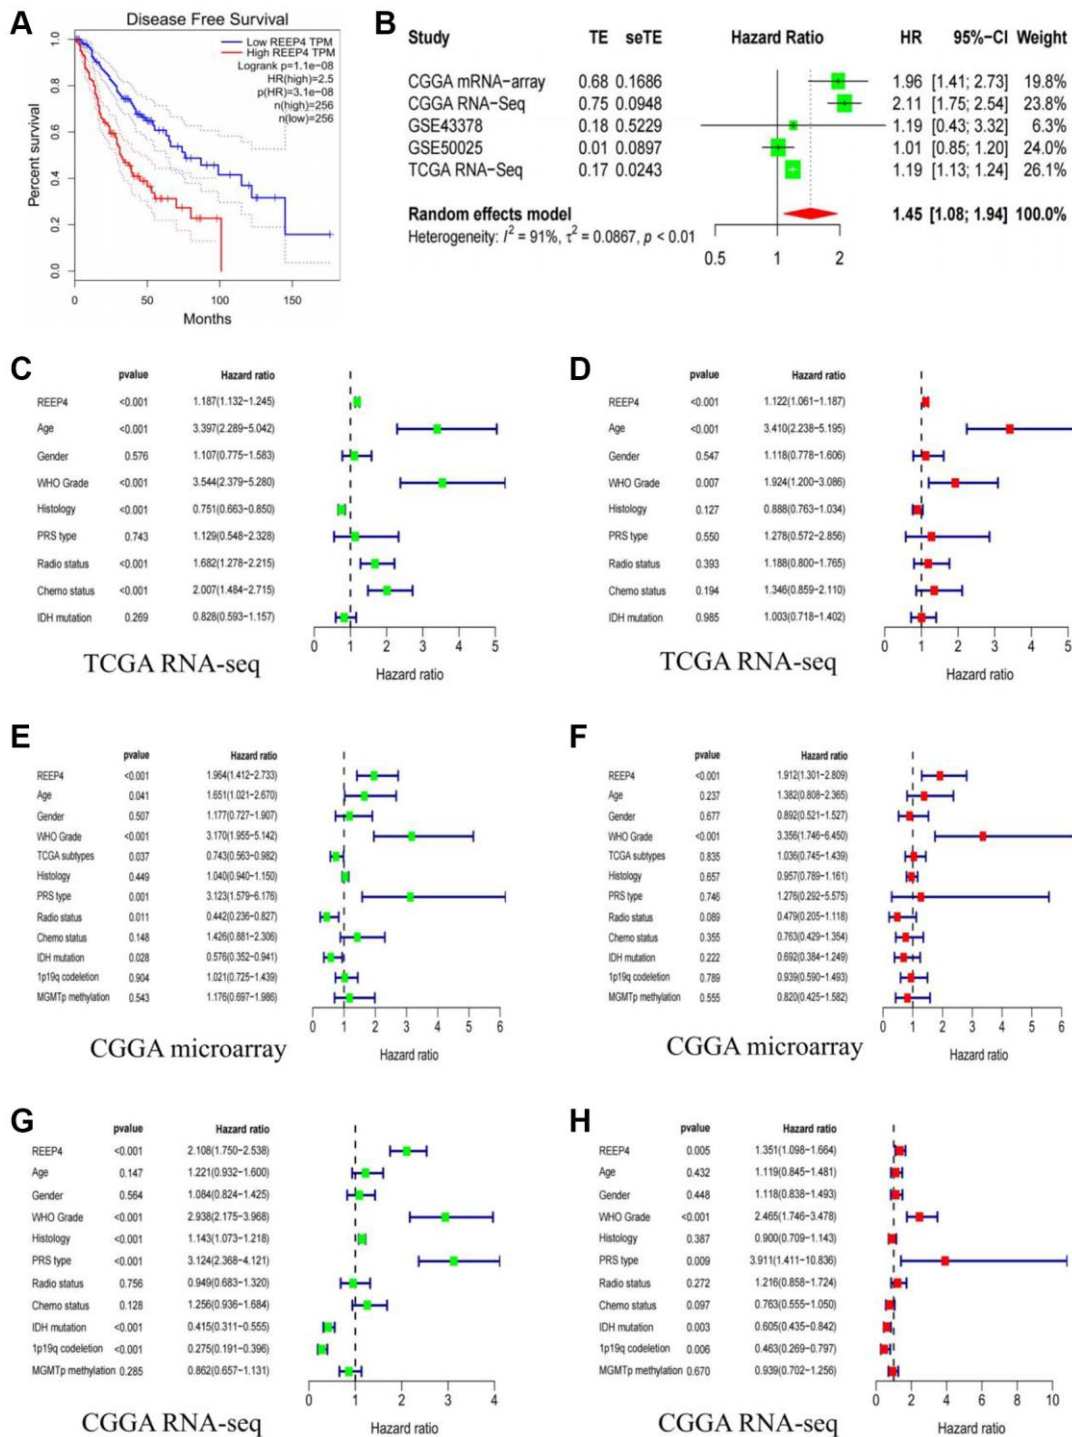

**Supplementary Figure 2. The Prognostic value of REEP4.** (A) Effect of receptor accessory protein 4 (REEP4) on disease-free survival of patients with lower-grade glioma (LGG). (B) Meta-analysis showing that elevated REEP4 expression is a risk prognostic factor for LGG (HR = 1.45, 95% CI: 1.08; 1.94). Abbreviations: HR: hazard ratio; CI: confidence interval. (C, D) Univariate and multivariate analysis based on TCGA RNA-seq database show that REEP4 is a risk factor for LGG prognosis. (E, F) Univariate and multivariate analysis based on CGGA microarray database show that REEP4 is a risk factor for LGG prognosis. (G, H) Univariate and multivariate analysis based on CGGA RNA-seq database show that REEP4 is a risk factor for LGG prognosis.

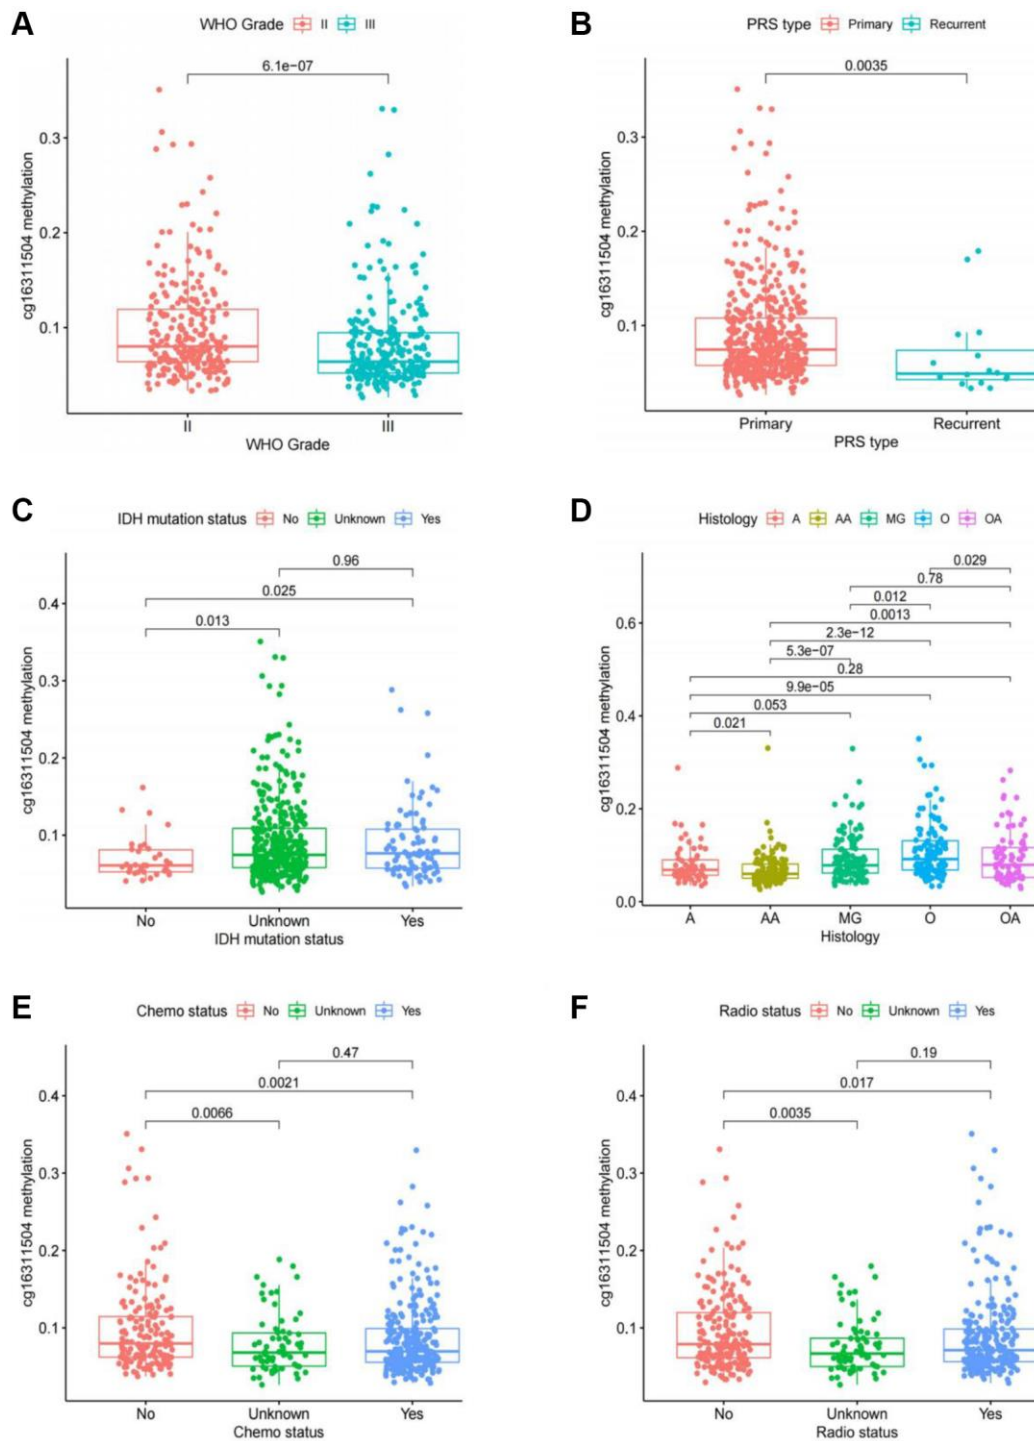

**Supplementary Figure 3. Relationship between methylation site cg16311504 and the clinical characteristics of lower-grade glioma (LGG).** (A) World Health Organization grade. (B) PRS type. (C) Isocitrate dehydrogenase mutation status. (D) Histological subtype. (E) Chemotherapy status. (F) Radiotherapy status.

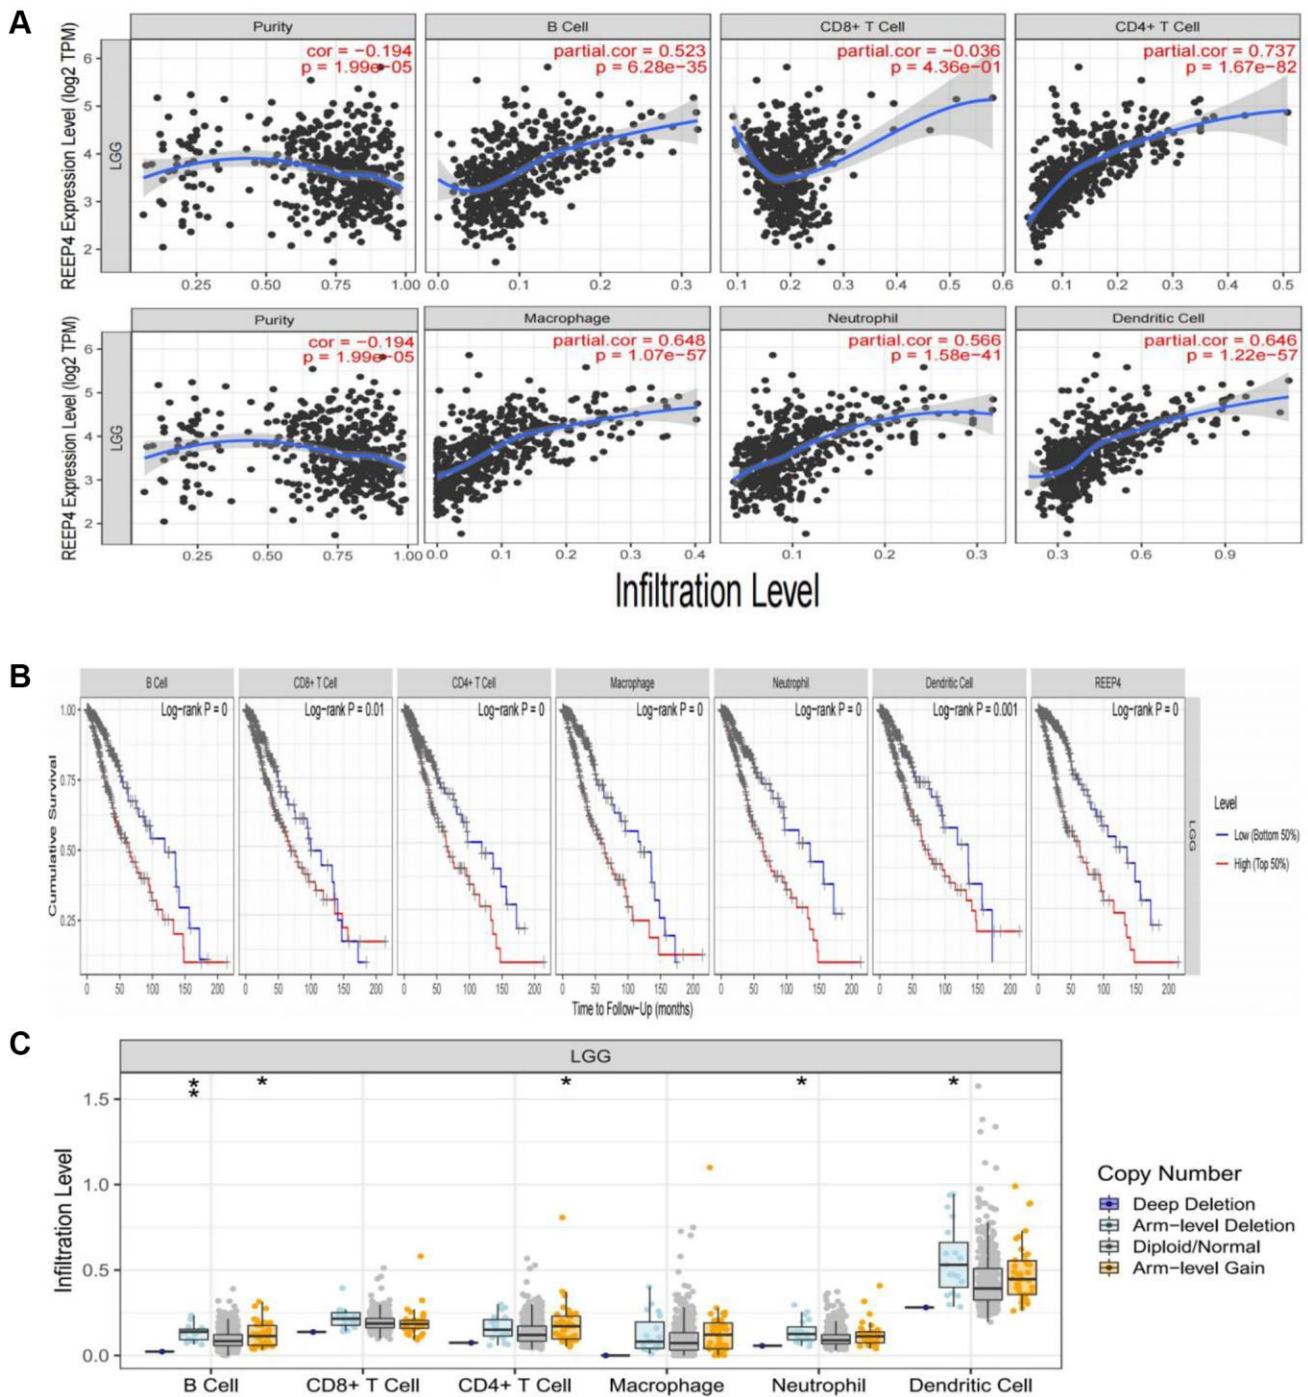

**Supplementary Figure 4. The relationship between receptor accessory protein 4 (REEP4) expression and immune infiltration in lower-grade glioma (LGG). (A) REEP4 is negatively correlated with tumor purity and CD8+ T cells and positively correlated with B cells, CD4+ T cells, macrophages, neutrophils, and dendritic cells. (B) Six kinds of immune cells are negatively correlated with the overall survival of patients with LGG. (C) Relationship between the copy number variation of REEP4 and immune cell infiltration in LGG. \* $P < 0.05$ . \*\* $P < 0.01$ .**
