# Supplementary material for: Potential value of expression of receptor accessory protein 4 for evaluating the prognosis of lower-grade glioma patients
Source: publisher site journal article supplement (doi:10.18632/aging.205695), 2024-03-28
Supplement: Supplementary file [file aging-v16i7-205695-supplementary-material-SD2.pdf]

## SUPPLEMENTARY TABLES

**Supplementary Table 1. The detailed clinical features of LGG patients in TCGA RNA-seq.**

| Covariates          | Type      | Total | Percentages (%) |
|---------------------|-----------|-------|-----------------|
| Age                 | ≤41       | 260   | 51.69%          |
|                     | >41       | 243   | 48.31%          |
| Gender              | Female    | 225   | 44.73%          |
|                     | Male      | 278   | 55.27%          |
| WHO Grade           | II        | 243   | 48.31%          |
|                     | III       | 260   | 51.69%          |
| Radio status        | No        | 187   | 37.18%          |
|                     | Unknown   | 72    | 14.31%          |
|                     | Yes       | 244   | 48.51%          |
| Chemo status        | No        | 167   | 33.20%          |
|                     | Unknown   | 66    | 13.12%          |
|                     | Yes       | 270   | 53.68%          |
| PRS type            | Primary   | 489   | 97.22%          |
|                     | Recurrent | 14    | 2.78%           |
| IDH mutation status | No        | 34    | 6.76%           |
|                     | Unknown   | 378   | 75.15%          |
|                     | Yes       | 91    | 18.09%          |
| expression          | High      | 251   | 49.90%          |
|                     | Low       | 252   | 50.10%          |
| methylation         | High      | 251   | 49.90%          |
|                     | Low       | 252   | 50.10%          |

**Supplementary Table 2. The detailed clinical features of LGG patients in CGGA microarray.**

| Covariates        | Type      | Total | Percentages (%) |
|-------------------|-----------|-------|-----------------|
| PRS type          | Primary   | 127   | 89.44%          |
|                   | Recurrent | 15    | 10.56%          |
| WHO Grade         | II        | 92    | 64.79%          |
|                   | III       | 50    | 35.21%          |
| Gender            | Female    | 66    | 46.48%          |
|                   | Male      | 76    | 53.52%          |
| Age               | ≤41       | 83    | 58.45%          |
|                   | >41       | 59    | 41.55%          |
| Radio status      | No        | 18    | 12.68%          |
|                   | Yes       | 124   | 87.32%          |
| Chemo status      | No        | 79    | 55.63%          |
|                   | Yes       | 63    | 44.37%          |
| IDH mutation      | No        | 48    | 33.80%          |
|                   | Yes       | 94    | 66.20%          |
| 1p19q codeletion  | No        | 31    | 21.83%          |
|                   | Unknown   | 97    | 68.31%          |
|                   | Yes       | 14    | 9.86%           |
| MGMTp methylation | No        | 102   | 71.83%          |
|                   | Yes       | 40    | 28.17%          |

**Supplementary Table 3. The detailed clinical features of LGG patients in CGGA RNA-seq.**

| <b>Covariates</b> | <b>Type</b> | <b>Total</b> | <b>Percentages (%)</b> |
|-------------------|-------------|--------------|------------------------|
| PRS type          | Primary     | 273          | 67.74%                 |
|                   | Recurrent   | 130          | 32.26%                 |
| WHO Grade         | II          | 177          | 43.92%                 |
|                   | III         | 226          | 56.08%                 |
| Gender            | Female      | 171          | 42.43%                 |
|                   | Male        | 232          | 57.57%                 |
| Age               | ≤41         | 222          | 55.09%                 |
|                   | >41         | 181          | 44.91%                 |
| Radio status      | No          | 88           | 21.84%                 |
|                   | Yes         | 315          | 78.16%                 |
| Chemo status      | No          | 134          | 33.25%                 |
|                   | Yes         | 269          | 66.75%                 |
| IDH mutation      | No          | 100          | 24.81%                 |
|                   | Yes         | 303          | 75.19%                 |
| 1p19q codeletion  | No          | 280          | 69.48%                 |
|                   | Yes         | 123          | 30.52%                 |
| MGMTp methylation | No          | 165          | 40.94%                 |
|                   | Yes         | 238          | 59.06%                 |
